# Supplementary material for: Reduced Ca2+ spark activity contributes to detrusor overactivity of rats with partial bladder outlet obstruction
Source: publisher site journal article supplement (doi:10.18632/aging.102855), 2020-02-29
Supplement: Supplementary file [file aging-v12i5-102855-supplementary-material-SD1.pdf]

## SUPPLEMENTARY FIGURE

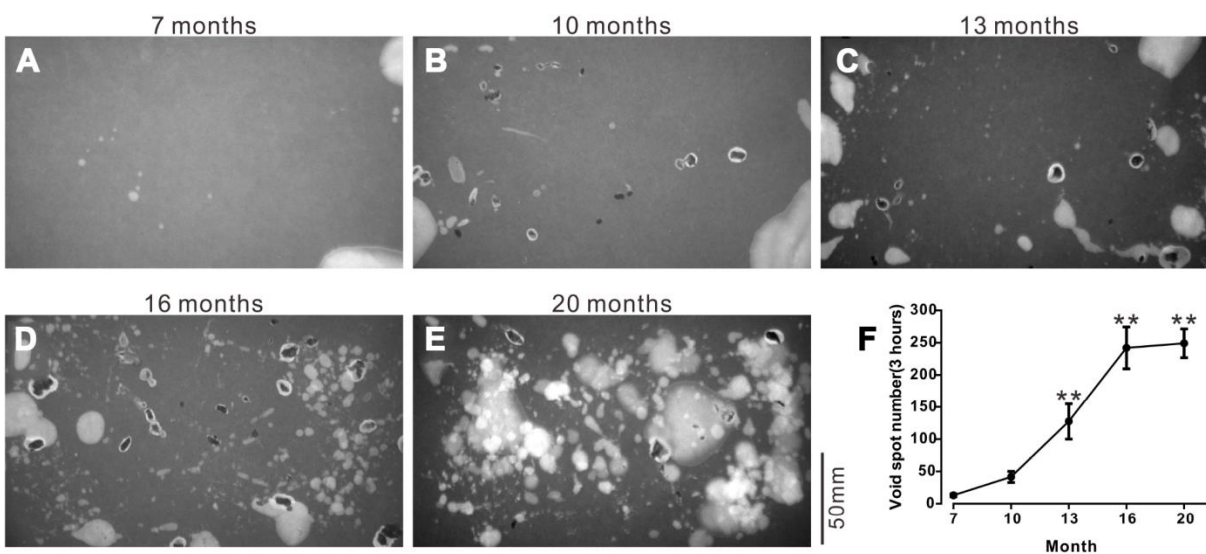

**Supplementary Figure 1. The void spots of mice were found to have increased concomitantly with an increase in age. (A–E)** are void spots of 7 month, 10 month, 13 month, 16 month, and 20 month aged mice respectively. (F) Summary data of (A–E). We used one-way ANOVA for comparisons between treatment groups. VS 7 months, \*\* $P < 0.01$ .
